# Supplementary material for: Influence of graphene oxide supports on solution-phase catalysis of thiolate-protected palladium nanoparticles in water
Source: Royal Society of Chemistry journal article supplement (doi:10.1039/c6nj02898e), 2016-11-11
Supplement: c6nj02898e1.pdf [file c6nj02898e1.pdf]

Electronic Supplementary Information

**Influence of Graphene Oxide Supports on Solution-Phase Catalysis of  
Thiolate-Protected Palladium Nanoparticles in Water**

*Vivian Chen, Hanqing Pan, Roxanne Jacobs, Shahab Derakhshan and Young-Seok Shon\**

Department of Chemistry and Biochemistry, California State University, Long Beach, 1250  
Bellflower Blvd., Long Beach, California, 90840, United States.

*\*For correspondence: Email: ys.shon@csulb.edu.*

|      |                                                                                                               |   |
|------|---------------------------------------------------------------------------------------------------------------|---|
| I.   | Spectroscopic and Microscopic Characterization of Pd Nanoparticles and Pd Nanoparticle-Graphene Oxide Hybrids | 2 |
| II.  | Heat Treatments of Palladium Nanoparticle-Graphene Oxide Hybrids                                              | 4 |
| III. | Catalysis Studies Comparing PdNP, PdNP/GO, and Heated PdNP/GO                                                 | 6 |
| IV.  | Recyclability and Colloidal Stability of PdNP, PdNP/GO, and Heated PdNP/GO                                    | 8 |

## I. Spectroscopic and Microscopic Characterization of Pd Nanoparticles and Pd Nanoparticle-Graphene Oxide Hybrids

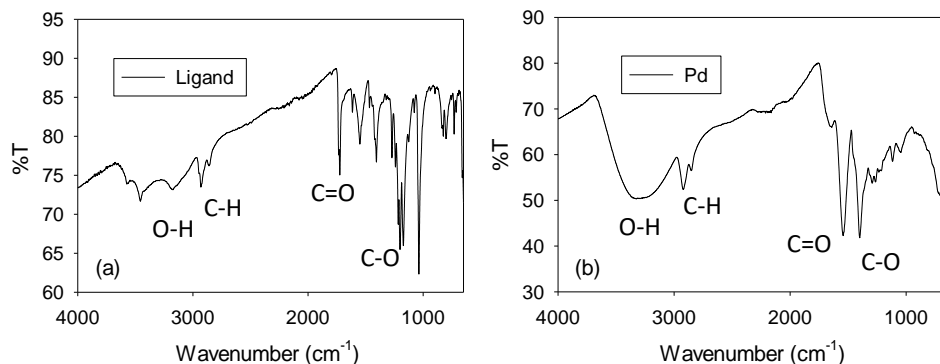

**Figure S1.** IR spectra of (a) sodium  $\omega$ -carboxyl-S-hexanethiosulfate (the ligand precursor) and (b)  $\omega$ -carboxylate-1-hexanethiolate-capped palladium nanoparticles. The peaks at  $>3400\text{ cm}^{-1}$  in spectrum (a) is due to C=O overtone. The presence of O-H, C-H, C=O, and C-O stretching vibrations are clearly seen on both spectra.

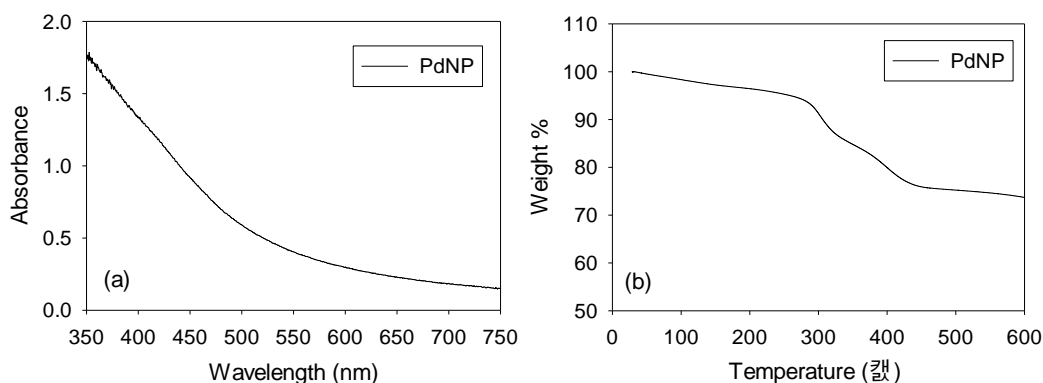

**Figure S2.** (a) UV-Vis spectrum and (b) TGA graph of  $\omega$ -carboxylate-1-hexanethiolate-capped palladium nanoparticles. No absorption or plasmon bands are seen in UV-vis spectrum. TGA plot shows a  $\sim 10\%$  weight loss by  $300\text{ }^{\circ}\text{C}$  and an additional  $15\%$  by  $400\text{ }^{\circ}\text{C}$ .

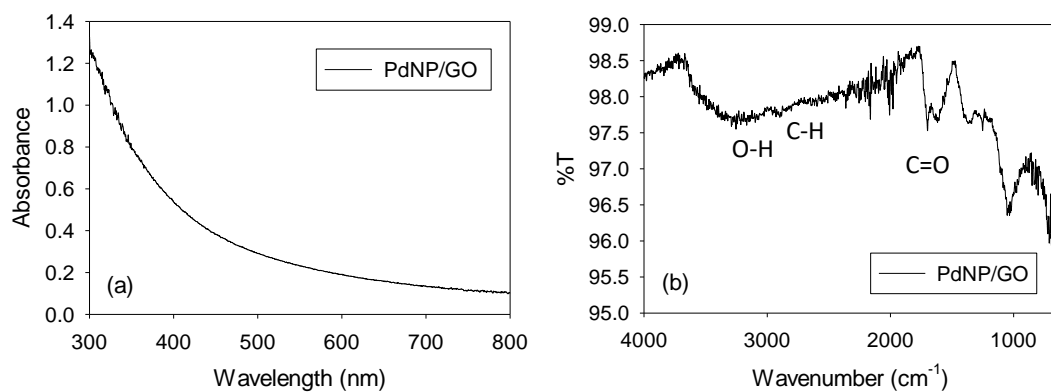

**Figure S3.** (a) UV-vis and (b) IR spectra of PdNP/GO hybrids. Only an exponential decay with increasing wavelength is shown in spectra (a). Stretching vibrations corresponding to the IR characteristics of  $\omega$ -carboxylate-1-hexanethiolate ligands and GO are shown in spectra (b).

## II. Heat Treatments of Palladium Nanoparticle-Graphene Oxide

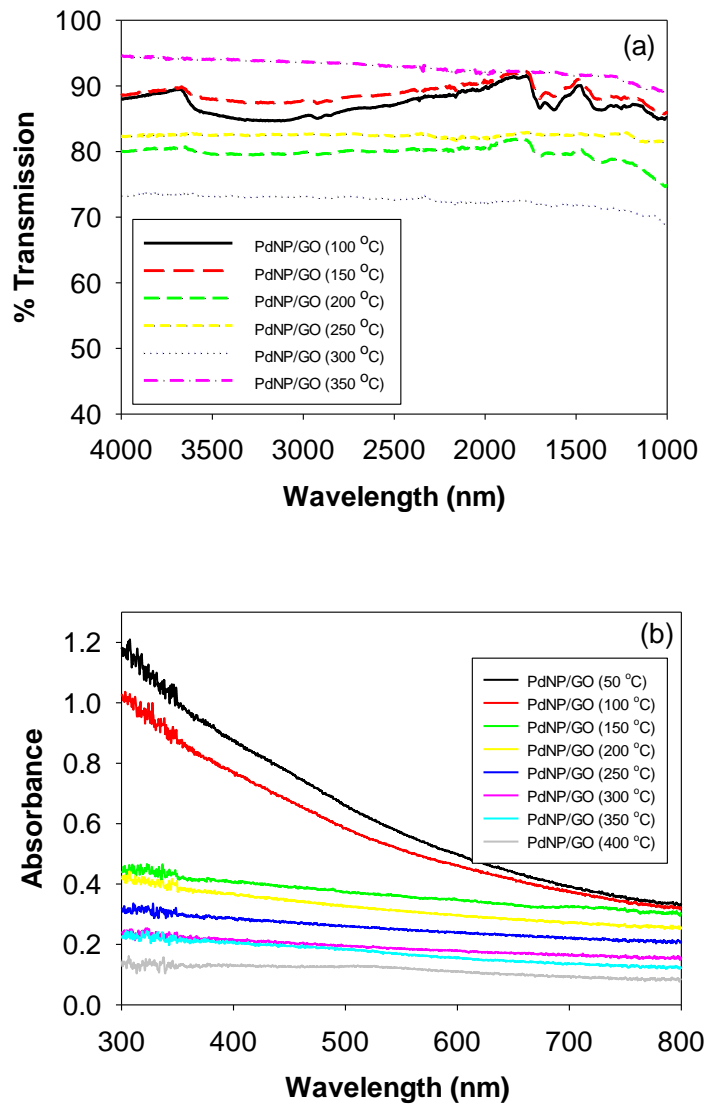

**Figure S4.** a) IR and b) UV-Vis spectra of PdNP/GO hybrids heated at 50-400 °C.

**Table S1.** The transitions of the average core size and dispersity of heated PdNP/GO.

| Temperature (°C) | Particles       |
|------------------|-----------------|
|                  | PdNP/GO         |
| 50               | $2.03 \pm 0.81$ |
| 100              | $2.07 \pm 0.96$ |
| 150              | $2.38 \pm 1.58$ |
| 200              | $2.41 \pm 1.21$ |
| 250              | $2.46 \pm 1.34$ |
| 300              | $7.06 \pm 2.85$ |

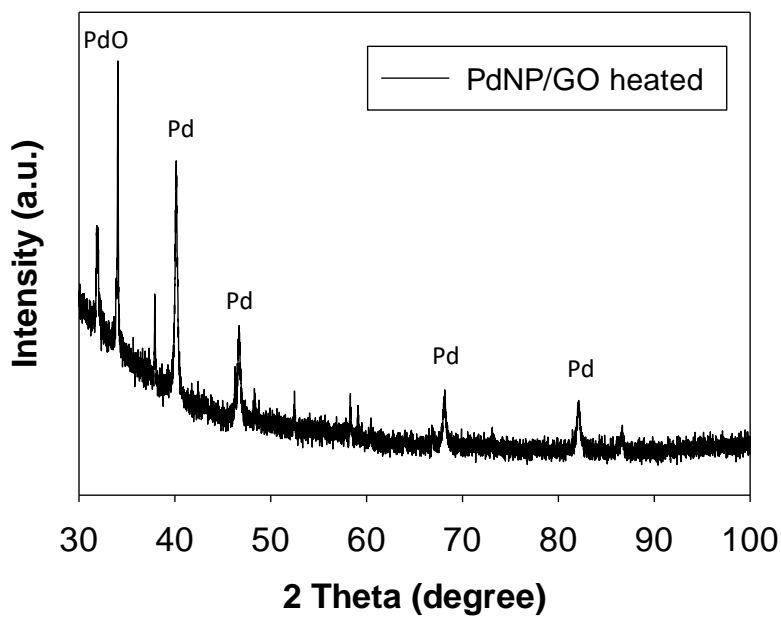

**Figure S5.** Powder XRD pattern of PdNP/GO hybrids heated at 300 °C.

### III. Catalysis Studies Comparing PdNP, PdNP/GO, and Heated PdNP/GO

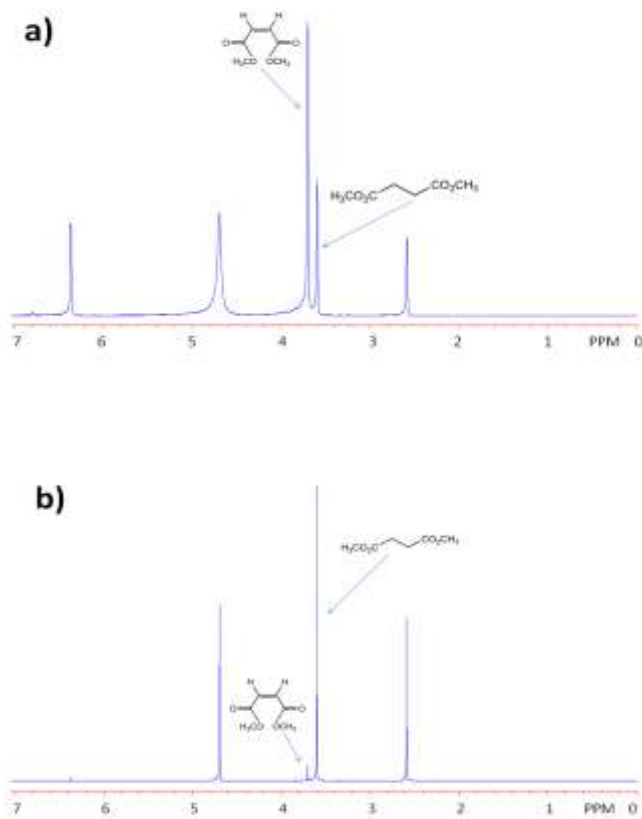

**Figure S6.** Examples of NMR spectra of DMAD hydrogenation showing the signals for semi- and full-hydrogenation products. The semi-hydrogenation product has two distinct hydrogens at  $\delta$  3.80 ppm ( $-\text{OCH}_3$ ) and  $\delta$  6.50 ppm ( $\text{C}=\text{C}-\text{H}$ ). The full-hydrogenation product also has two distinct hydrogens at  $\delta$  3.70 ppm ( $-\text{CO}_2\text{CH}_3$ ) and  $\delta$  2.69 ppm ( $\text{CH}_2-\text{CH}_2$ ).

**Table S2.** Summary of turn-over-frequency (TOF) for semi- and full-hydrogenation products with PdNP, PdNP/GO, and PdNP/GO heated at 300 °C.

| PdNP <sup>a</sup>   |                     | PdNP/GO <sup>a</sup> |                     | PdNP/GO 300 °C <sup>b</sup> |                     |
|---------------------|---------------------|----------------------|---------------------|-----------------------------|---------------------|
| TOF <sub>semi</sub> | TOF <sub>full</sub> | TOF <sub>semi</sub>  | TOF <sub>full</sub> | TOF <sub>semi</sub>         | TOF <sub>full</sub> |
| 916                 | 201                 | 871                  | 156                 | 48                          | 321                 |

<sup>a</sup> TOF (site<sup>-1</sup>hour<sup>-1</sup>) was calculated based on the model of Pd<sub>225</sub> (2.0 nm) with 140 surface Pd atoms after 3 h reaction. <sup>b</sup> TOF (site<sup>-1</sup>hour<sup>-1</sup>) was calculated based on the model of Pd<sub>6266</sub> (5.5 nm) with 1472 surface Pd atoms after 24 h reaction.

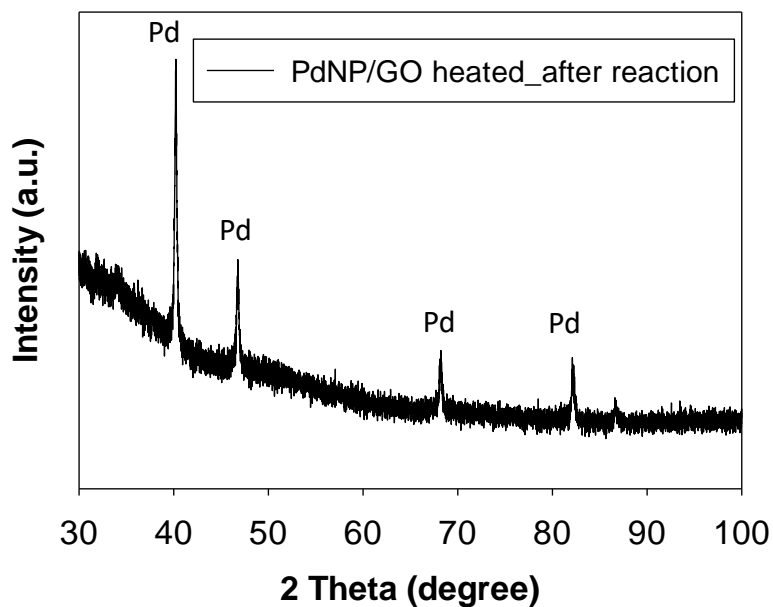

**Figure S7.** Powder XRD pattern of heated PdNP/GO hybrids after catalytic reaction.

IV. Recyclability and Stability of PdNP, PdNP/GO, and Heated PdNP/GO

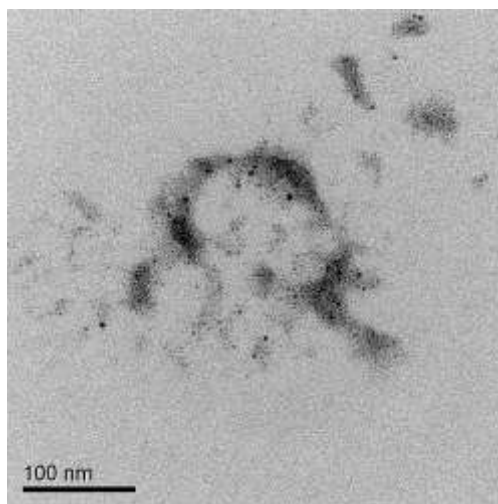

(a)

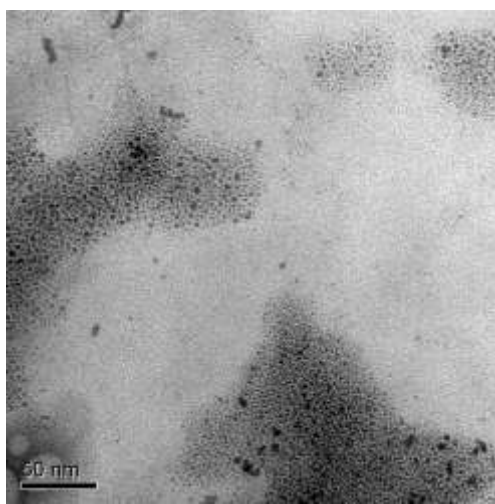

(b)

**Figure S8.** TEM images of (a) PdNP and (b) PdNP/GO after the recycled uses.
